# Supplementary material for: Impaired T Cell Responsiveness to Interleukin-6 in Hematological Patients with Invasive Aspergillosis
Source: PubMed Central journal article supplement (PMC4383538; doi:10.1371/journal.pone.0123171), 2015-04-02

### Naïve T helper cells (CD3+CD4+CD45RO-)

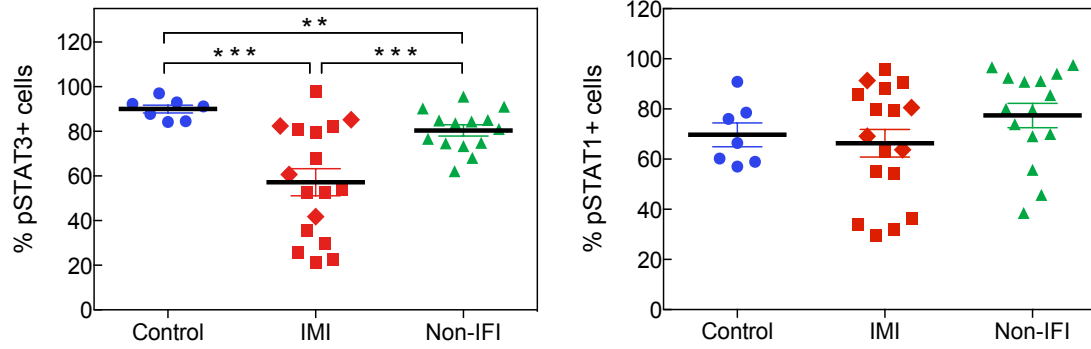

### Memory T helper cells (CD3+CD4+CD45RO+)

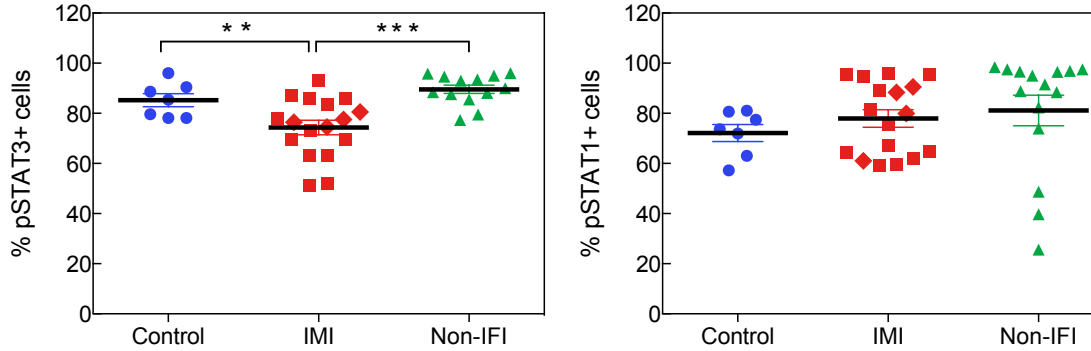

### Monocytes (CD45highCD33+)

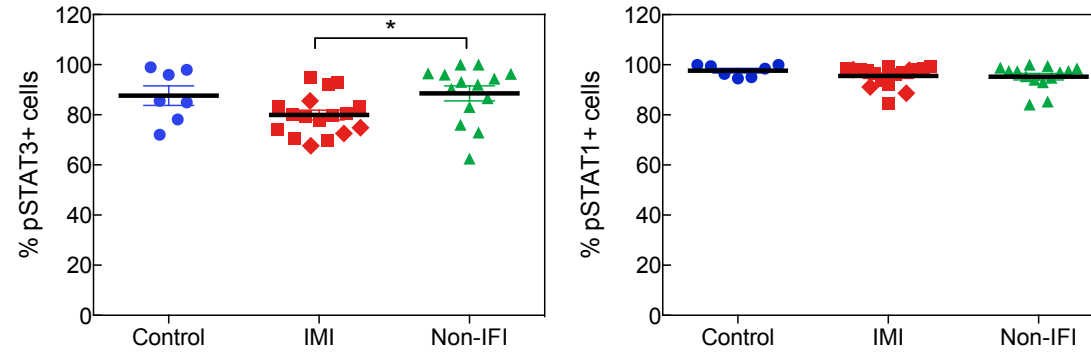

Supplement: pone.0123171.s002.pdf [file pone.0123171.s002.pdf]
