# Supplementary material for: Impaired T Cell Responsiveness to Interleukin-6 in Hematological Patients with Invasive Aspergillosis
Source: PubMed Central journal article supplement (PMC4383538; doi:10.1371/journal.pone.0123171), 2015-04-02
Supplement: pone.0123171.s006.pdf [file pone.0123171.s006.pdf]

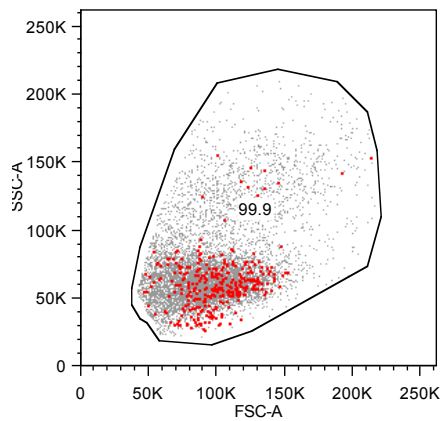

Ungated

\*  
 singlets1  
 singlets2  
 T cells (cd45high cd3pos)  
 Th naive (CD4pos45ROneg)

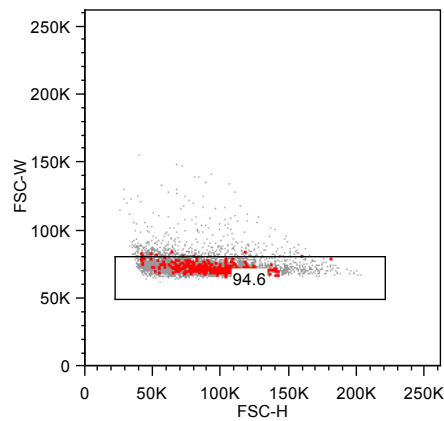

lymp mono

\*  
 lymp mono  
 singlets2  
 T cells (cd45high cd3pos)  
 Th naive (CD4pos45ROneg)

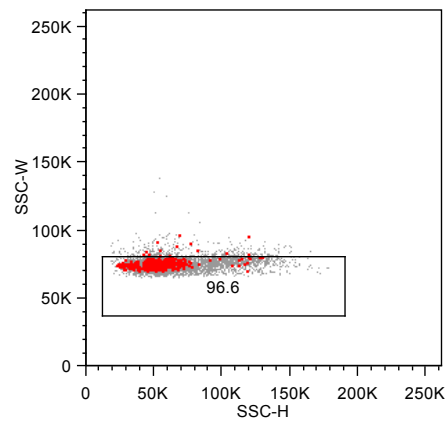

lymp mono  
 singlets1

\*  
 lymp mono  
 singlets1  
 T cells (cd45high cd3pos)  
 Th naive (CD4pos45ROneg)

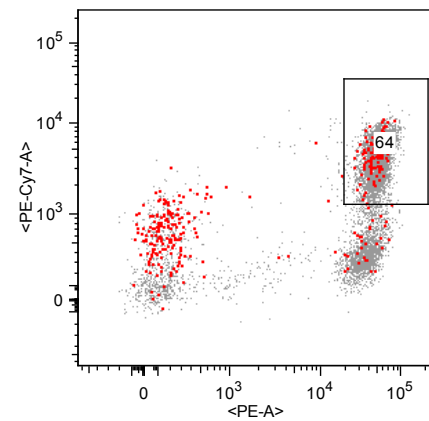

lymp mono  
 singlets1  
 singlets2

\*  
 lymp mono  
 singlets1  
 singlets2  
 Th naive (CD4pos45ROneg)

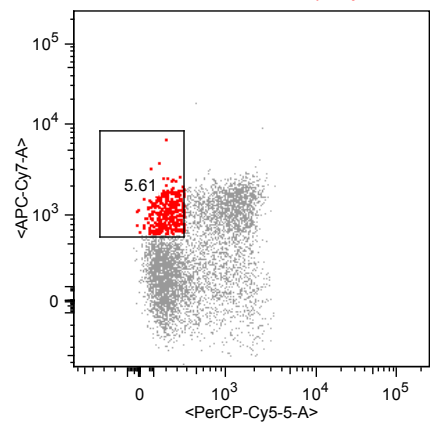

lymp mono  
 singlets1  
 singlets2  
 T cells (cd45high cd3pos)

\*  
 lymp mono  
 singlets1  
 singlets2  
 T cells (cd45high cd3pos)  
 Th naive (CD4pos45ROneg)
