# Supplementary material for: Impaired T Cell Responsiveness to Interleukin-6 in Hematological Patients with Invasive Aspergillosis
Source: PubMed Central journal article supplement (PMC4383538; doi:10.1371/journal.pone.0123171), 2015-04-02
Supplement: pone.0123171.s007.pdf [file pone.0123171.s007.pdf]

| Supporting Table 1. Clinical features of study patients |            |     |                          |                  |                                    |                           |                                     |
|---------------------------------------------------------|------------|-----|--------------------------|------------------|------------------------------------|---------------------------|-------------------------------------|
| Study ID                                                | Age, years | Sex | Hematological malignancy | Disease status   | Chemotherapy*                      | Type of HSCT†             | Risk factors for IMI**              |
| IA_001                                                  | 38         | F   | AML                      | Relapse          | IT ARA-C, IT hydrocortisone        | Double cord blood         | GVHD, steroids, umbilical cord, CMV |
| IA_002                                                  | 47         | M   | B-ALL                    | Relapse          | Dana-Farber 2009>>>Hyper-CVAD      | n/a                       | Neutropenia, steroids               |
| IA_003                                                  | 66         | M   | AML                      | Relapse          | 3+7>>>FLAG-IDA                     | n/a                       | Neutropenia                         |
| IA_004                                                  | 64         | F   | MDS                      | Remission        | ATG, CsA 2009                      | Matched-unrelated HSCT    | GVHD, steroids                      |
| IA_005                                                  | 49         | F   | AML                      | Remission        | Azacitidine in 2012                | Matched related HSCT      | GVHD, steroids                      |
| IA_006                                                  | 69         | F   | AML                      | Remission        | FLAG-IDA 2013                      | n/a                       | Neutropenia                         |
| IA_007°                                                 | 55         | F   | AML                      | Remission        | NOVE-HiDAC 2010                    | Match-unrelated HSCT      | GVHD, CMV                           |
| IA_008                                                  | 57         | M   | AML                      | Not in remission | FLAG-IDA                           | n/a                       | Neutropenia                         |
| IA_009                                                  | 72         | M   | Lymphoma>>>AML           | Not in remission | Alemtuzumab/CHOP 2010 >>> FLAG-IDA | n/a                       | Neutropenia                         |
| IA_010                                                  | 61         | M   | Relapsed AML             | Remission        | FLAG-IDA                           | Match-unrelated HSCT 2009 | Neutropenia                         |
| IA_011                                                  | 64         | M   | CMML>AML                 | Remission        | NOVE-HiDAC>>> 3+7                  | n/a                       | Neutropenia                         |
| IA_012                                                  | 34         | M   | CMML                     | Remission        | Hydroxyurea                        | Matched-related HSCT      | GVHD, steroids, CMV                 |
| IA_013                                                  | 61         | F   | B-ALL                    | Not in remission | Vincristine, MTX                   | n/a                       | -                                   |
| IA_018                                                  | 70         | M   | AML                      | Remission        | FLAG-IDA                           | n/a                       | Neutropenia                         |
|                                                         |            |     |                          |                  |                                    |                           |                                     |
| Non-IFI_001                                             | 44         | M   | AML                      | Remission        | 3+7 induction, ARA-C consolidation | n/a                       | Neutropenia, CMV                    |
| Non-IFI_002                                             | 33         | F   | B-ALL                    | Remission        | Dana-Farber                        | n/a                       | Neutropenia                         |
| Non-IFI_003                                             | 62         | M   | AML (mixed phenotype)    | Remission        | Dana-Farber                        | n/a                       | Neutropenia                         |
| Non-IFI_004                                             | 43         | F   | AML                      | Remission        | 3+7>>>FLAG-IDA                     | Match-unrelated HSCT      | GVHD, CMV                           |
| Non-IFI_005                                             | 48         | M   | NHL                      | Remission        | R-CHOP>>>GDP salvage ttx           | Autologus                 | Neutropenia                         |

|                    |    |   |         |                     |                                                                 |                           |                              |
|--------------------|----|---|---------|---------------------|-----------------------------------------------------------------|---------------------------|------------------------------|
| <b>Non-IFI_007</b> | 23 | M | B-ALL   | Relapse             | Dana-Farber >>>MTX                                              | n/a                       | Neutropenia                  |
| <b>Non-IFI_008</b> | 51 | F | ALL     | Remission           | Dana-Farber plus<br>DASATINIB (without L-<br>ASPARAGINASE) 2013 | Matched related HSCT      | GVHD , steroids, neutropenia |
| <b>Non-IFI_011</b> | 68 | M | MDS     | Remission           | Azacytidine 2011                                                | Matched-unrelated<br>HSCT | GVHD, steroids, neutropenia  |
| <b>Non-IFI_015</b> | 46 | M | AML     | Remission           | 3+7 (2011)                                                      | Matched unrelated<br>HSCT | Chronic GVHD, steroids, CMV  |
| <b>Non-IFI_018</b> | 42 | M | B-ALL   | Not in<br>remission | Dana Farber protocol                                            | n/a                       | Neutropenia                  |
| <b>Non-IFI_020</b> | 53 | M | B-ALL   | Not in<br>remission | Dana-Farber protocol                                            | n/a                       | Neutropenia, CMV             |
| <b>Non-IFI_022</b> | 41 | F | AML     | Remission           | 3+7                                                             | n/a                       | Neutropenia                  |
| <b>Non-IFI_028</b> | 45 | F | AML     | Remission           | 3+7                                                             | n/a                       | Neutropenia                  |
| <b>Non-IFI_029</b> | 50 | M | AML     | Remission           | 3+7>>>FLAG_IDA                                                  | n/a                       | Neutropenia                  |
| <b>Non-IFI_030</b> | 38 | F | AML     | Not in<br>remission | 3+7>>>FLAG_IDA                                                  | n/a                       | Neutropenia                  |
| <b>Non-IFI_031</b> | 55 | M | AML     | Remission           | 3+7                                                             | n/a                       | Neutropenia, mucositis       |
|                    |    |   |         |                     |                                                                 |                           |                              |
| <b>Mucor_001</b>   | 65 | M | AML/MDS | Remission           | Pred, MTX,<br>imuran>>>azacytidine                              | n/a                       | Neutropenia                  |
| <b>Mucor_002</b>   | 25 | M | ALL     | Remission           | DFCI                                                            | n/a                       | Neutropenia                  |
| <b>Mucor_003</b>   | 49 | M | AML     | Relapse             | 3+7>>>FLAG-IDA                                                  | n/a                       | Neutropenia                  |
| <b>Mucor_004</b>   | 58 | M | AML     | Remission           | 3+7                                                             | n/a                       | Neutropenia                  |

| Supporting Table 1. Clinical features of study patients (continued) |          |          |                                           |                             |                              |                       |                                                      |                                                       |                                                          |
|---------------------------------------------------------------------|----------|----------|-------------------------------------------|-----------------------------|------------------------------|-----------------------|------------------------------------------------------|-------------------------------------------------------|----------------------------------------------------------|
| Study ID                                                            | Serum GM | BAL GM   | BAL culture                               | Cytology/<br>Pathology      | CT chest<br>findings         | Antifungal<br>therapy | Antifungal<br>at the time<br>of sample<br>collection | Time from<br>IMI to<br>sample<br>collection<br>(days) | Time from<br>HSCT to<br>sample<br>collection<br>(months) |
| IA_001                                                              | n/a      | Positive | <i>A. fumigatus</i>                       |                             | Nodules,<br>consolidation    | VOR > CAS<br>> L-AMB  | VOR                                                  | 11                                                    | 13                                                       |
| IA_002                                                              | n/a      | Positive | No growth                                 |                             | Nodules,<br>pleural effusion | VOR                   | VOR                                                  | 48                                                    |                                                          |
| IA_003                                                              | Positive | Positive | No growth                                 |                             | Nodules                      | VOR > CAS<br>> L-AMB  | AMB                                                  | 42                                                    |                                                          |
| IA_004                                                              | Negative | Negative | <i>A. niger</i>                           |                             | Nodule, halo<br>sign+        | VOR                   | VOR                                                  | 70                                                    | 56                                                       |
| IA_005                                                              | Negative | Negative | <i>A. fumigatus</i>                       |                             | bilateral<br>opacities       | VOR                   | VOR                                                  | 57                                                    | 26                                                       |
| IA_006                                                              | Negative | Positive | No growth                                 |                             | Nodules                      | VOR                   | None                                                 | 315                                                   |                                                          |
| IA_007°                                                             | Negative | Negative | <i>A. fumigatus</i><br><i>Zygomycetes</i> | Septate<br>hyphae<br>on BAL | GGO                          | VOR > POS<br>> CAS    | None                                                 | 389                                                   | 41                                                       |
| IA_008                                                              | Negative | Positive | No growth                                 |                             | Nodules                      | VOR                   | VOR                                                  | 11                                                    |                                                          |
| IA_009                                                              | Negative | Positive | <i>A. fumigatus</i>                       | Septate<br>hyphae<br>on BAL | Nodules                      | CAS > L-<br>AMB > VOR | AMB                                                  | 2                                                     |                                                          |
| IA_010                                                              | Positive | Positive | No growth                                 |                             | Nodules                      | VOR > L-<br>AMB       | AMB                                                  | 16                                                    | 58                                                       |
| IA_011                                                              | Negative | Positive | No growth                                 |                             | GGO, cavitary<br>mass        | VOR                   | VOR                                                  | 70                                                    |                                                          |
| IA_012                                                              | Negative | Positive | <i>A. niger</i>                           |                             | Nodule, cavitary<br>lesion   | L-AMB                 | AMB                                                  | 11                                                    | 16.5                                                     |
| IA_013                                                              | Negative | Positive | No growth                                 |                             | Consolidation                | VOR                   | VOR                                                  | 20                                                    |                                                          |

|                    |          |          |           |  |                                                                |           |                   |    |      |
|--------------------|----------|----------|-----------|--|----------------------------------------------------------------|-----------|-------------------|----|------|
|                    |          |          |           |  | b/l, GGO                                                       |           |                   |    |      |
| <b>IA_018</b>      | Negative | Positive | No growth |  | Pulmonary nodules, GGO, halo sign+                             | VOR       | VOR               | 23 |      |
|                    |          |          |           |  |                                                                |           |                   |    |      |
| <b>NonIFI_001</b>  | Negative | nd       | nd        |  | Normal                                                         | None      | None              |    |      |
| <b>NonIFI_002</b>  | nd       | nd       | nd        |  | Normal                                                         | MIC       | MIC (prophylaxis) |    |      |
| <b>NonIFI_003</b>  | Negative | nd       | nd        |  | nd                                                             | None      | None              |    |      |
| <b>NonIFI_004</b>  | Negative | Negative | No growth |  | Small nodules                                                  | None      | None              |    | 11   |
| <b>NonIFI_005</b>  | nd       | nd       | nd        |  | Nd                                                             | None      | None              |    | 7    |
| <b>NonIFI_007</b>  | nd       | nd       | nd        |  | Small nodules                                                  | VOR > CAS | CAS (empiric)     |    |      |
| <b>Non-IFI_008</b> | nd       | nd       | nd        |  | Small area of GGO                                              | None      | None              |    | 9    |
| <b>Non-IFI_011</b> | nd       | nd       | nd        |  | Mild heterogeneity of the lung parenchyma in keeping with GVHD | None      | None              |    | 37.5 |
| <b>Non-IFI_015</b> | nd       | nd       | nd        |  | Normal                                                         | None      | None              |    | 36   |
| <b>Non-IFI_018</b> | nd       | nd       | nd        |  | Small nodules                                                  | None      | None              |    |      |
| <b>Non-IFI_020</b> | nd       | nd       | nd        |  | GGO                                                            | None      | None              |    |      |
| <b>Non-IFI_022</b> | nd       | nd       | nd        |  | Normal                                                         | None      | None              |    |      |
| <b>Non-IFI_028</b> | nd       | nd       | nd        |  | Stable small solitary nodule                                   | None      | None              |    |      |
| <b>Non-IFI_029</b> | nd       | nd       | nd        |  | Stable small solitary nodule                                   | None      | None              |    |      |
| <b>Non-IFI_030</b> | nd       | nd       | nd        |  | Stable 3mm                                                     | None      | None              |    |      |

|                    |          |          |           |                                 |                       |                |      |     |  |
|--------------------|----------|----------|-----------|---------------------------------|-----------------------|----------------|------|-----|--|
|                    |          |          |           |                                 | nodules               |                |      |     |  |
| <b>Non-IFI_031</b> | Nd       | Nd       | Nd        |                                 | Normal                | None           | None |     |  |
|                    |          |          |           |                                 |                       |                |      |     |  |
| <b>Mucor_001</b>   | Negative | nd       | nd        | Mucor                           | Nodules, GGO          | L-AMB          | AMB  | 23  |  |
| <b>Mucor_002</b>   | Nd       | nd       | nd        | Mucor                           | Normal                | L-AMB          | AMB  | 17  |  |
| <b>Mucor_003</b>   | Negative | Negative | No growth | Mucor                           | opacities,<br>nodules | L-AMB<br>>POS  | POS  | 177 |  |
| <b>Mucor_004</b>   | Negative | nd       | nd        | Mucor<br>( <i>Rhizopus</i><br>) | Normal                | L-AMB ><br>POS | POS  | 125 |  |

IA, invasive aspergillosis; IFI, invasive fungal infection; Mucor, Mucormycosis; AML, acute myeloid leukemia; ALL, acute lymphoblastic leukemia; CMML, chronic myelomonocytic leukemia; NHL, non-Hodgkin's lymphoma; MDS, myelodysplastic syndrome; HSCT, hematopoietic stem cell transplant; ATG, anti-thymoglobulin; CsA, Cyclosporine; GM, galactomannan; GVHD, graft-versus-host disease, CMV, cytomegalovirus; GGO, ground glass opacities; VOR, voriconazole; CAS, caspofungin; L-AMB, liposomal Amphotericin B; MIC, micafungin; POS, posaconazole; n/a, not applicable; nd, not done

°Mixed IFI: this patient had recurrent episodes of IA and in addition to *Aspergillus fumigatus* also grew *Zygomycetes* in a recent bronchoalveolar lavage.

\*Most recent chemotherapy regimen. 3+7= Daunorubicin, cytarabine (Ara-c); FLAG-IDA: Idarubicin, Fludarabine and Ara-c; Hyper-CVAD: Cyclophosphamide, Doxorubicin, Vincristine, Daunorubicin, Dexamethasone plus CNS prophylaxis: intrathecal (IT) Methotrexate, Ara-C; DFCI: Vincristine, Doxorubicin, MTX, methylprednisolone plus intrathecal Ara-C, MTX, hydrocortisone; NOVE-HIDAC: Mitoxantrone, Etoposide, Ara-c; R-CHOP: Rituximab, Cyclophosphamide, Doxorubicin, Vincristine, prednisolone (pred). GDP: Gemcitabine, Dexamethasone and Cisplatin.

\*\*CMV reactivation defined as blood CMV DNA level in peripheral blood >100IU/ml in two occasions within the 12 months prior to data of sample collection.

†Full chimerism, defined as >95% of cells of donor origin, was documented for all the HSCT recipients, except IA\_010 who had evidence of mixed chimerism, and IA\_001 and non-IFI\_011 in whom chimerism data was not available.
