# Supplementary material for: Impaired T Cell Responsiveness to Interleukin-6 in Hematological Patients with Invasive Aspergillosis
Source: PubMed Central journal article supplement (PMC4383538; doi:10.1371/journal.pone.0123171), 2015-04-02
Supplement: pone.0123171.s008.pdf [file pone.0123171.s008.pdf]

| <b>Supporting Table 2. Demographic and selected clinical features by study group</b> |                    |                       |                                    |
|--------------------------------------------------------------------------------------|--------------------|-----------------------|------------------------------------|
|                                                                                      | <b>IMI† (n=18)</b> | <b>Non-IFI (n=16)</b> | <b>χ<sup>2</sup>, df (P value)</b> |
| <b>Age</b>                                                                           |                    |                       |                                    |
| Older than 40 years, n (%)                                                           | 15 (83.3)          | 13 (81.2)             | <b>0.025, 1 (0.874)</b>            |
| <b>Sex</b>                                                                           |                    |                       |                                    |
| Male, n (%)                                                                          | 12 (66.7)          | 10 (62.5)             | <b>0.064, 1 (0.800)</b>            |
| <b>Hematological malignancy, n (%)</b>                                               |                    |                       |                                    |
| ALL                                                                                  | 3 (16.7)           | 5 (31.2)              | <b>3.060, 3 (0.383)</b>            |
| AML/MDS                                                                              | 14 (77.8)          | 10 (62.5)             |                                    |
| CMML                                                                                 | 1 (5.6)            | 0 (0)                 |                                    |
| NHL                                                                                  | 0 (0)              | 1 (6.2)               |                                    |
| <b>Disease status, n (%)</b>                                                         |                    |                       |                                    |
| Not in remission                                                                     | 3 (16.7)           | 3 (18.8)              | <b>1.732, 2 (0.421)</b>            |
| Relapse                                                                              | 4 (22.2)           | 1 (6.2)               |                                    |
| Remission°                                                                           | 11 (61.1)          | 12 (75.0)             |                                    |
| <b>Type of HSCT, n (%)</b>                                                           |                    |                       |                                    |
| Autologous                                                                           | 0 (0)              | 1 (6.2)               | <b>2.267, 4 (0.687)</b>            |
| Double cord blood                                                                    | 1 (5.6)            | 0 (0)                 |                                    |
| Matched related                                                                      | 2 (11.1)           | 1 (6.2)               |                                    |
| Matched unrelated                                                                    | 3 (16.7)           | 3 (18.8)              |                                    |
| <b>Neutropenia*</b>                                                                  |                    |                       |                                    |
| n (%)                                                                                | 13 (72.2)          | 14 (87.5)             | <b>1.209, 1 (0.271)</b>            |
| <b>Graft-versus-host disease</b>                                                     |                    |                       |                                    |
| n (%)                                                                                | 5 (27.8)           | 4 (25.0)              | <b>0.034, 1 (0.855)</b>            |
| <b>Steroid use</b>                                                                   |                    |                       |                                    |
| n (%)                                                                                | 5 (27.8)           | 3 (18.8)              | <b>0.384, 1 (0.536)</b>            |
| <b>CMV reactivation**</b>                                                            |                    |                       |                                    |
| n (%)                                                                                | 3 (16.7)           | 4 (25.0)              | <b>0.360, 1 (0.549)</b>            |

IMI, invasive mold infection; non-IFI, non-invasive fungal infection; ALL, acute lymphoid leukemia; AML, acute myeloid leukemia; MDS, myelodysplastic syndrome; NHL, non-Hodgkin's lymphoma; CMML, chronic myelomonocytic leukemia.

†This group includes invasive aspergillosis and mucormycosis patients. Remission defined as <5% blasts on bone marrow biopsy after induction chemotherapy. \*Neutropenia defined as absolute neutrophil count (ANC) <0.5 × 10<sup>9</sup>/L. \*\*CMV reactivation defined as blood CMV DNA level in peripheral blood >100IU/ml in two occasions within the 12 months prior to data of sample collection.
